# Supplementary material for: Prognostic Value of Peripheral Blood Lymphocyte Telomere Length in Gynecologic Malignant Tumors
Source: PubMed Central journal article supplement (PMC7352644; doi:10.3390/cancers12061469), 2020-06-04
Supplement: cancers-12-01469-s001.pdf [file cancers-12-01469-s001.pdf]

Supplemental Materials

# Prognostic Value of Peripheral Blood Lymphocyte Telomere Length in Gynecologic Malignant Tumors

Kamrunnahar Shanta, Kentaro Nakayama, Masako Ishikawa, Tomoka Ishibashi Hitomi Yamashita, Seiya Sato, Hiroki Sasamori, Kiyoka Sawada, Sonomi Kurose, Hossain Mohammad Mahmud, Sultana Razia, Kouji Iida, Noriyoshi Ishikawa and Satoru Kyo

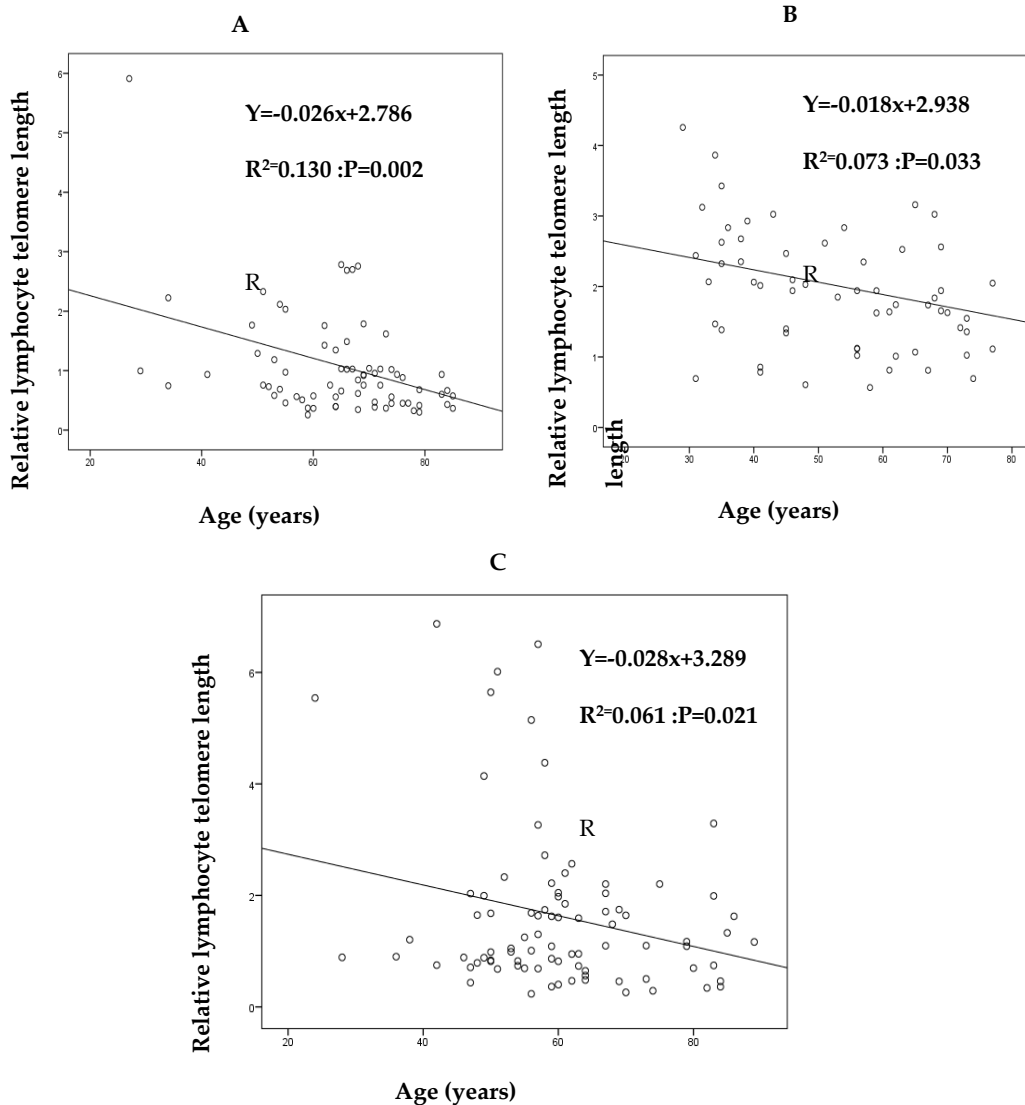

**Figure S1.** Spearman correlation analysis between relative telomere length and age. Relative lymphocyte telomere length (RLT) in peripheral blood and age of patients with gynecological cancer. Spearman correlation analysis in (A) patients age with ovarian cancer (N = 72) and absolute RLT value; (B) patients age with cervical cancer (N = 63) and absolute RLT value and (C) patients age with endometrial cancer (N = 87) and absolute RLT value.

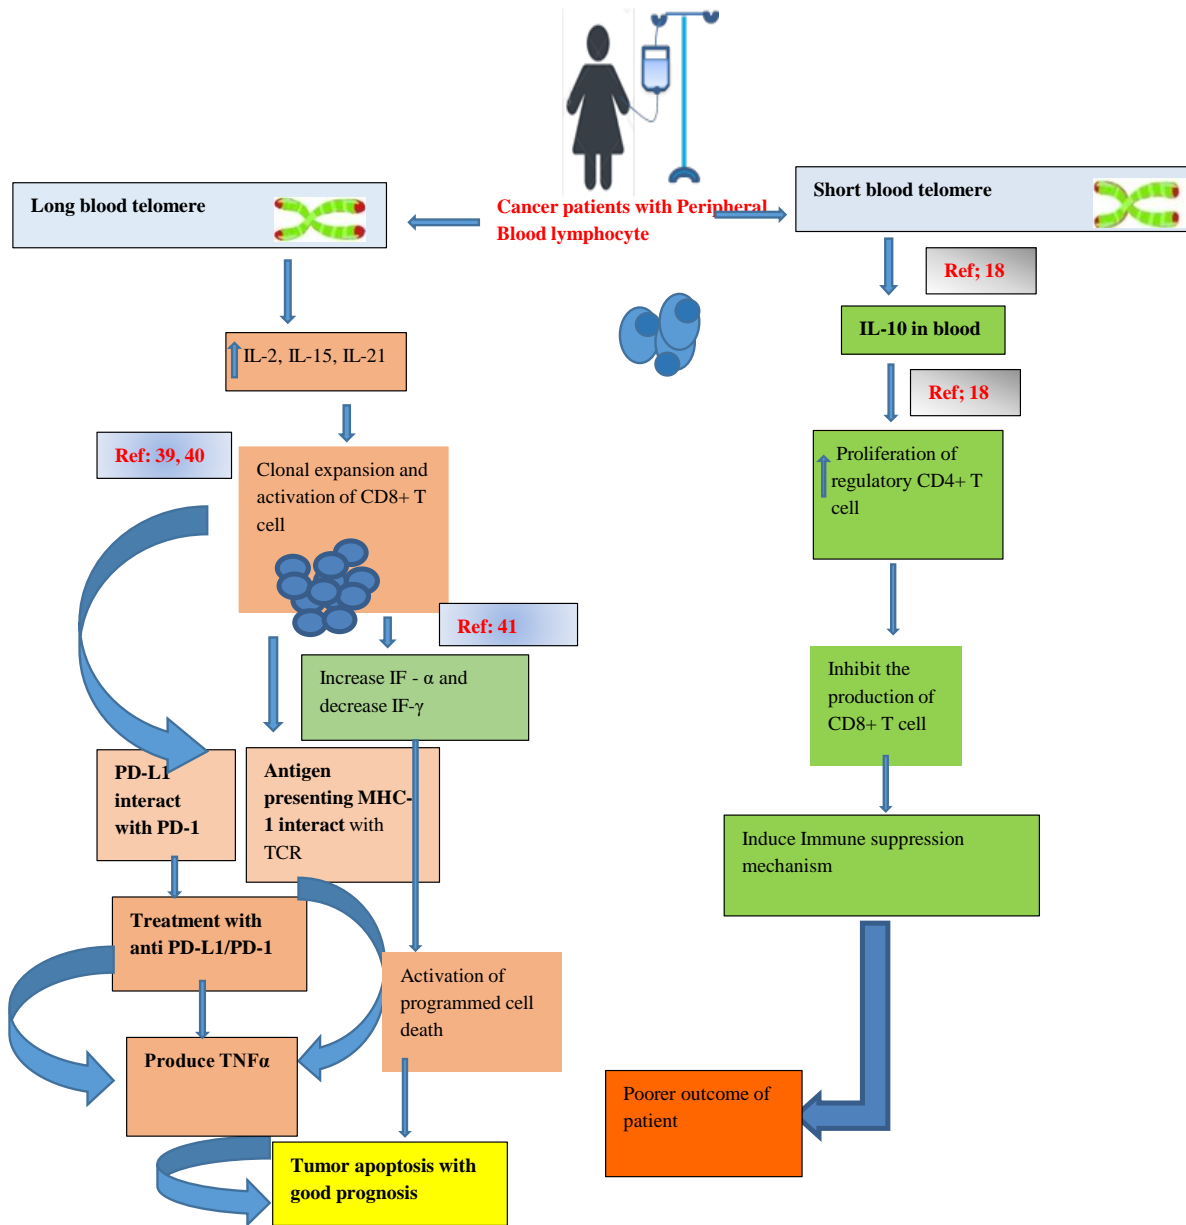

**Figure S2.** Hypothesis of Lymphocyte telomere length associated with host immunity. Hypothetical impact of telomere length on the host immune system. Long peripheral blood lymphocyte telomeres increase cytokines IL-2, IL-15, and IL-21, which are responsible for the proliferation of CD8+ T cells and good prognoses. Short telomeres cause an increase in IL-10, which suppresses the cellular immune response and is associated with poor prognosis.

**Table S1.** Absolute value of RLT of OC, CC and EC.

| Case NO. | RLT of OC | Case NO. | RLT of CC | Case NO. | RLT of EC |
|----------|-----------|----------|-----------|----------|-----------|
| 1        | 2.329467  | 1        | 2.439637  | 1        | 0.361817  |
| 2        | 2.783050  | 2        | 2.324090  | 2        | 0.733736  |
| 3        | 2.688249  | 3        | 1.021012  | 3        | 0.457973  |
| 4        | 2.757447  | 4        | 1.024620  | 4        | 1.624505  |
| 5        | 3.944931  | 5        | 1.940683  | 5        | 0.988514  |
| 6        | 2.114036  | 6        | 1.068684  | 6        | 0.562529  |
| 7        | 0.414660  | 7        | 1.624505  | 7        | 0.743979  |
| 8        | 1.785919  | 8        | 1.628263  | 8        | 0.952638  |
| 9        | 0.301452  | 9        | 1.114709  | 9        | 1.647182  |
| 10       | 0.452712  | 10       | 1.940900  | 10       | 1.624505  |

|    |          |    |          |    |          |
|----|----------|----|----------|----|----------|
| 11 | 0.448548 | 11 | 2.675855 | 11 | 5.540438 |
| 12 | 0.756109 | 12 | 2.060984 | 12 | 1.605846 |
| 13 | 0.368567 | 13 | 2.351096 | 13 | 1.301342 |
| 14 | 0.366021 | 14 | 1.848899 | 14 | 1.248331 |
| 15 | 0.365177 | 15 | 2.834970 | 15 | 1.741101 |
| 16 | 0.954842 | 16 | 1.639588 | 16 | 1.089249 |
| 17 | 0.395021 | 17 | 3.863745 | 17 | 1.685683 |
| 18 | 0.385108 | 18 | 2.348078 | 18 | 0.695762 |
| 19 | 0.395934 | 19 | 0.784580 | 19 | 1.086735 |
| 20 | 0.325335 | 20 | 1.356604 | 20 | 1.170128 |
| 21 | 0.255843 | 21 | 3.123870 | 21 | 0.363493 |
| 22 | 2.032610 | 22 | 0.605696 | 22 | 1.677912 |
| 23 | 1.037660 | 23 | 1.341022 | 23 | 1.205808 |
| 24 | 0.686184 | 24 | 0.565135 | 24 | 0.835088 |
| 25 | 1.289370 | 25 | 0.810378 | 25 | 1.709214 |
| 26 | 0.450625 | 26 | 2.046700 | 26 | 1.977028 |
| 27 | 0.678302 | 27 | 1.741101 | 27 | 1.635804 |
| 28 | 1.183724 | 28 | 1.940176 | 28 | 2.719485 |
| 29 | 0.972655 | 29 | 1.010493 | 29 | 2.037312 |
| 30 | 0.842842 | 30 | 2.065751 | 30 | 6.871653 |
| 31 | 0.562529 | 31 | 1.654811 | 31 | 2.329467 |
| 32 | 0.935191 | 32 | 3.758091 | 32 | 0.823591 |
| 33 | 1.025741 | 33 | 1.112136 | 33 | 0.983957 |
| 34 | 0.935191 | 34 | 2.013911 | 34 | 0.817902 |
| 35 | 0.430276 | 35 | 2.834970 | 35 | 2.400497 |
| 36 | 1.617015 | 36 | 1.385109 | 36 | 0.738840 |
| 37 | 0.665880 | 37 | 1.737083 | 37 | 0.260616 |
| 38 | 0.582367 | 38 | 1.547565 | 38 | 2.032610 |
| 39 | 0.882703 | 39 | 0.812252 | 39 | 1.990779 |
| 40 | 0.509328 | 40 | 1.414214 | 40 | 0.886791 |
| 41 | 0.935191 | 41 | 1.397970 | 41 | 2.046748 |
| 42 | 0.344681 | 42 | 2.614738 | 42 | 1.995384 |
| 43 | 0.756109 | 43 | 1.467472 | 43 | 1.745129 |
| 44 | 0.918064 | 44 | 0.692555 | 44 | 1.643381 |
| 45 | 1.427344 | 45 | 0.692555 | 45 | 1.164734 |
| 46 | 0.574349 | 46 | 2.928171 | 46 | 4.141060 |
| 47 | 0.601513 | 47 | 2.094588 | 47 | 0.749154 |
| 48 | 0.574349 | 48 | 3.160165 | 48 | 1.848899 |
| 49 | 1.347234 | 49 | 3.963202 | 49 | 0.289172 |
| 50 | 1.030492 | 50 | 3.024400 | 50 | 3.264058 |
| 51 | 0.469761 | 51 | 2.560900 | 51 | 3.289964 |
| 52 | 0.558644 | 52 | 3.024437 | 52 | 1.328686 |
| 53 | 0.754432 | 53 | 1.122462 | 53 | 1.482541 |
| 54 | 0.729863 | 54 | 2.525671 | 54 | 2.566853 |
| 55 | 1.765406 | 55 | 2.027919 | 55 | 5.145579 |
| 56 | 2.700700 | 56 | 4.247655 | 56 | 6.012846 |
| 57 | 0.370274 | 57 | 1.939810 | 57 | 2.203810 |
| 58 | 0.656712 | 58 | 2.626849 | 58 | 6.505990 |
| 59 | 5.912289 | 59 | 4.257481 | 59 | 2.219139 |
| 60 | 1.757267 | 60 | 1.836128 | 60 | 0.435275 |
| 61 | 2.224272 | 61 | 0.854607 | 61 | 0.483011 |
| 62 | 0.756109 | 62 | 2.467984 | 62 | 0.647671 |
| 63 | 0.995390 | 63 | 3.426336 | 63 | 0.948246 |
| 64 | 0.615572 |    |          | 64 | 0.888843 |
| 65 | 0.456916 |    |          | 65 | 0.234339 |
| 66 | 0.557354 |    |          | 66 | 0.790041 |
| 67 | 1.018656 |    |          | 67 | 0.679871 |
| 68 | 1.487958 |    |          | 68 | 0.340722 |

|    |          |
|----|----------|
| 69 | 0.745700 |
| 70 | 1.025741 |
| 71 | 0.930880 |
| 72 | 1.023374 |

|    |          |
|----|----------|
| 69 | 1.591073 |
| 70 | 0.467596 |
| 71 | 0.501157 |
| 72 | 2.203810 |
| 73 | 0.400535 |
| 74 | 0.708742 |
| 75 | 0.687771 |
| 76 | 1.096825 |
| 77 | 1.098712 |
| 78 | 1.009285 |
| 79 | 0.461158 |
| 80 | 0.692555 |
| 81 | 4.379014 |
| 82 | 0.901250 |
| 83 | 0.864537 |
| 84 | 1.049717 |
| 85 | 5.643799 |
| 86 | 0.817902 |
| 87 | 0.882100 |

---
